# Supplementary material for: Cis-interactions between Notch and its ligands block ligand-independent Notch activity
Source: eLife. 2014 Dec 8;3:e04415. doi: 10.7554/eLife.04415 (PMC4286723; doi:10.7554/eLife.04415)
Supplement: Supplementary file 1. — Supplementary clonal data file. Excel worksheet containing clonal data from the egg chamber and the wing disc. DOI: http://dx.doi.org/10.7554/eLife.04415.016 [file elife04415s001.xlsx]

## Sheet: Sheet1
Egg Chamber Data – All clones represent Dl-/Dl- germline/follicle cell clones
Genotype	Clone	Stage	Cut staining (D-downregulated, U-upregulated)
hsFLP/+;; 82B, RFP/82B, Dl[revF10]	1	7	D
hsFLP/+;; 82B, RFP/82B, Dl[revF10]	2	8	D
hsFLP/+;; 82B, RFP/82B, Dl[revF10]	3	7	D
hsFLP/+;; 82B, RFP/82B, Dl[revF10]	4	8	D
hsFLP/+;; 82B, RFP/82B, Dl[revF10]	5	7	D-U
hsFLP/+;; 82B, RFP/82B, Dl[revF10]	6	7	D
hsFLP/+;; 82B, RFP/82B, Dl[revF10]	7	7	D
hsFLP/+;; 82B, RFP/82B, Dl[revF10]	8	7	U
hsFLP/+;; 82B, RFP/82B, Dl[revF10]	9	8	U
hsFLP/+;; 82B, RFP/82B, Dl[revF10]	10	8	U
hsFLP/+;; 82B, RFP/82B, Dl[revF10]	11	7	D
hsFLP/+;; 82B, RFP/82B, Dl[revF10]	12	7	U
hsFLP/+;; 82B, RFP/82B, Dl[revF10]	13	7	D
hsFLP/+;; 82B, RFP/82B, Dl[revF10]	14	8	D
hsFLP/+;; 82B, RFP/82B, Dl[revF10]	15	7	D
hsFLP/+;; 82B, RFP/82B, Dl[revF10]	16	9	D
hsFLP/+;; 82B, RFP/82B, Dl[revF10]	17	8	D
hsFLP/+;; 82B, RFP/82B, Dl[revF10]	18	8	D
hsFLP/+;; 82B, RFP/82B, Dl[revF10]	19	8	D
hsFLP/+;; 82B, RFP/82B, Dl[revF10]	20	9	U
hsFLP/+;; 82B, RFP/82B, Dl[revF10]	21	9	D
hsFLP/+;; 82B, RFP/82B, Dl[revF10]	22	8	D
hsFLP/+;; 82B, RFP/82B, Dl[revF10]	23	8	D
hsFLP/+;; 82B, RFP/82B, Dl[revF10]	24	8	D
hsFLP/+;; 82B, RFP/82B, Dl[revF10]	25	8	D
hsFLP/+;; 82B, RFP/82B, Dl[revF10]	26	8	D
hsFLP/+;; 82B, RFP/82B, Dl[revF10]	27	9	D
hsFLP/+;; 82B, RFP/82B, Dl[revF10]	28	?	D
hsFLP/+;; 82B, RFP/82B, Dl[revF10]	29	9	D
hsFLP/+;; 82B, RFP/82B, Dl[revF10]	30	?	D
hsFLP/+; actGAL4, UAS-GFP/UAS-N[IR]; 82B, Gal80/ 82B, Dl[revF10]	1	9	U
hsFLP/+; actGAL4, UAS-GFP/UAS-N[IR]; 82B, Gal80/ 82B, Dl[revF10]	2	9	U
hsFLP/+; actGAL4, UAS-GFP/UAS-N[IR]; 82B, Gal80/ 82B, Dl[revF10]	3	9	U
hsFLP/+; actGAL4, UAS-GFP/UAS-N[IR]; 82B, Gal80/ 82B, Dl[revF10]	4	10	U
hsFLP/+; actGAL4, UAS-GFP/UAS-N[IR]; 82B, Gal80/ 82B, Dl[revF10]	5	10	U
hsFLP/+; actGAL4, UAS-GFP/UAS-N[IR]; 82B, Gal80/ 82B, Dl[revF10]	6	10	D
hsFLP/+; actGAL4, UAS-GFP/UAS-N[IR]; 82B, Gal80/ 82B, Dl[revF10]	7	8	U
hsFLP/+; actGAL4, UAS-GFP/UAS-N[IR]; 82B, Gal80/ 82B, Dl[revF10]	8	8	U
hsFLP/+; actGAL4, UAS-GFP/UAS-N[IR]; 82B, Gal80/ 82B, Dl[revF10]	9	9	U
hsFLP/+; actGAL4, UAS-GFP/UAS-N[IR]; 82B, Gal80/ 82B, Dl[revF10]	10	9	U
hsFLP/+; actGAL4, UAS-GFP/UAS-N[IR]; 82B, Gal80/ 82B, Dl[revF10]	11	8	U
hsFLP/+; actGAL4, UAS-GFP/UAS-N[IR]; 82B, Gal80/ 82B, Dl[revF10]	12	8	U
hsFLP/+; actGAL4, UAS-GFP/UAS-N[IR]; 82B, Gal80/ 82B, Dl[revF10]	13	8	U
hsFLP/+; actGAL4, UAS-GFP/UAS-N[IR]; 82B, Gal80/ 82B, Dl[revF10]	14	9	U
hsFLP/+; actGAL4, UAS-GFP/UAS-N[IR]; 82B, Gal80/ 82B, Dl[revF10]	15	9	D
hsFLP/+; actGAL4, UAS-GFP/UAS-N[IR]; 82B, Gal80/ 82B, Dl[revF10]	16	7	U
hsFLP/+; actGAL4, UAS-GFP/UAS-N[IR]; 82B, Gal80/ 82B, Dl[revF10]	17	7	U
hsFLP/+; actGAL4, UAS-GFP/UAS-N[IR]; 82B, Gal80/ 82B, Dl[revF10]	18	9	U
hsFLP/+; actGAL4, UAS-GFP/UAS-N[IR]; 82B, Gal80/ 82B, Dl[revF10]	19	8	U
hsFLP/+; actGAL4, UAS-GFP/UAS-N[IR]; 82B, Gal80/ 82B, Dl[revF10]	20	8	U
hsFLP/+; actGAL4, UAS-GFP/UAS-N[IR]; 82B, Gal80/ 82B, Dl[revF10]	21	9	U
hsFLP/+; actGAL4, UAS-GFP/UAS-N[IR]; 82B, Gal80/ 82B, Dl[revF10]	22	?	D
hsFLP/+; actGAL4, UAS-GFP/UAS-N[IR]; 82B, Gal80/ 82B, Dl[revF10]	23	?	D
hsFLP/+; actGAL4, UAS-GFP/UAS-N[IR]; 82B, Gal80/ 82B, Dl[revF10]	24	9	U
hsFLP/+; actGAL4, UAS-GFP/UAS-N[IR]; 82B, Gal80/ 82B, Dl[revF10]	25	9	U
hsFLP/+; actGAL4, UAS-GFP/UAS-N[IR]; 82B, Gal80/ 82B, Dl[revF10]	26	9	D
hsFLP/+; actGAL4, UAS-GFP/UAS-N[IR]; 82B, Gal80/ 82B, Dl[revF10]	27	8	U
hsFLP/+; actGAL4, UAS-GFP/UAS-N[IR]; 82B, Gal80/ 82B, Dl[revF10]	28	9	U
hsFLP/+; actGAL4, UAS-GFP/UAS-N[IR]; 82B, Gal80/ 82B, Dl[revF10]	29	8	U
hsFLP/+; actGAL4, UAS-GFP/UAS-N[IR]; 82B, Gal80/ 82B, Dl[revF10]	30	9	U
hsFLP/+; actGAL4, UAS-GFP/UAS-N[IR]; 82B, Gal80/ 82B, Dl[revF10]	31	9	U
hsFLP/+; actGAL4, UAS-GFP/UAS-N[IR]; 82B, Gal80/ 82B, Dl[revF10]	32	9	U
hsFLP/+; actGAL4, UAS-GFP/UAS-N[IR]; 82B, Gal80/ 82B, Dl[revF10]	33	9	U
hsFLP/+; actGAL4, UAS-GFP/UAS-N[IR]; 82B, Gal80/ 82B, Dl[revF10]	34	9	U
hsFLP/+; actGAL4, UAS-GFP/UAS-N[IR]; 82B, Gal80/ 82B, Dl[revF10]	35	8	U
hsFLP/+; actGAL4, UAS-GFP/UAS-N[IR]; 82B, Gal80/ 82B, Dl[revF10]	36	8	U
hsFLP/+; actGAL4, UAS-GFP/UAS-N[IR]; 82B, Gal80/ 82B, Dl[revF10]	37	8	U
hsFLP/+; actGAL4, UAS-GFP/UAS-N[IR]; 82B, Gal80/ 82B, Dl[revF10]	38	8	U
hsFLP/+; Gal80, 40A/Su(H)[47], 40A; tub-GAL4, UAS-GFP/UAS-Dl[IR]	1	?	U
hsFLP/+; Gal80, 40A/Su(H)[47], 40A; tub-GAL4, UAS-GFP/UAS-Dl[IR]	2	8	U
hsFLP/+; Gal80, 40A/Su(H)[47], 40A; tub-GAL4, UAS-GFP/UAS-Dl[IR]	3	8	U
hsFLP/+; Gal80, 40A/Su(H)[47], 40A; tub-GAL4, UAS-GFP/UAS-Dl[IR]	4	7	U
hsFLP/+; Gal80, 40A/Su(H)[47], 40A; tub-GAL4, UAS-GFP/UAS-Dl[IR]	5	9	U
hsFLP/+; Gal80, 40A/Su(H)[47], 40A; tub-GAL4, UAS-GFP/UAS-Dl[IR]	6	8	D
hsFLP/+; Gal80, 40A/Su(H)[47], 40A; tub-GAL4, UAS-GFP/UAS-Dl[IR]	7	8	U
hsFLP/+; Gal80, 40A/Su(H)[47], 40A; tub-GAL4, UAS-GFP/UAS-Dl[IR]	8	8	U
hsFLP/+; Gal80, 40A/Su(H)[47], 40A; tub-GAL4, UAS-GFP/UAS-Dl[IR]	9	8	U
hsFLP/+; Gal80, 40A/Su(H)[47], 40A; tub-GAL4, UAS-GFP/UAS-Dl[IR]	10	9	U
hsFLP/+; Gal80, 40A/Su(H)[47], 40A; tub-GAL4, UAS-GFP/UAS-Dl[IR]	11	9	U
hsFLP/+; Gal80, 40A/Su(H)[47], 40A; tub-GAL4, UAS-GFP/UAS-Dl[IR]	12	9	U
hsFLP/+; Gal80, 40A/Su(H)[47], 40A; tub-GAL4, UAS-GFP/UAS-Dl[IR]	13	9	U
hsFLP/+; Gal80, 40A/Su(H)[47], 40A; tub-GAL4, UAS-GFP/UAS-Dl[IR]	14	10	U
hsFLP/+; Gal80, 40A/Su(H)[47], 40A; tub-GAL4, UAS-GFP/UAS-Dl[IR]	15	10	U
hsFLP/+; Gal80, 40A/Su(H)[47], 40A; tub-GAL4, UAS-GFP/UAS-Dl[IR]	16	8	U
hsFLP/+; Gal80, 40A/Su(H)[47], 40A; tub-GAL4, UAS-GFP/UAS-Dl[IR]	17	8	U
hsFLP/+; Gal80, 40A/Su(H)[47], 40A; tub-GAL4, UAS-GFP/UAS-Dl[IR]	18	9	U
hsFLP/+; Gal80, 40A/Su(H)[47], 40A; tub-GAL4, UAS-GFP/UAS-Dl[IR]	19	7	U
hsFLP/+; Gal80, 40A/Su(H)[47], 40A; tub-GAL4, UAS-GFP/UAS-Dl[IR]	20	8	U
hsFLP/+; Gal80, 40A/Su(H)[47], 40A; tub-GAL4, UAS-GFP/UAS-Dl[IR]	21	8	U
hsFLP/+; Gal80, 40A/Su(H)[47], 40A; tub-GAL4, UAS-GFP/UAS-Dl[IR]	22	7	U
hsFLP/+; Gal80, 40A/Su(H)[47], 40A; tub-GAL4, UAS-GFP/UAS-Dl[IR]	23	9	U
hsFLP/+; Gal80, 40A/Su(H)[47], 40A; tub-GAL4, UAS-GFP/UAS-Dl[IR]	24	8	U
hsFLP/+; Act>y+>GAL4, UAS-GFP/+; UAS-Dl[IR]/+	1	>6	U
hsFLP/+; Act>y+>GAL4, UAS-GFP/+; UAS-Dl[IR]/+	2	>6	U
hsFLP/+; Act>y+>GAL4, UAS-GFP/+; UAS-Dl[IR]/+	3	>6	U
hsFLP/+; Act>y+>GAL4, UAS-GFP/+; UAS-Dl[IR]/+	4	>6	U
hsFLP/+; Act>y+>GAL4, UAS-GFP/+; UAS-Dl[IR]/+	5	>6	D
hsFLP/+; Act>y+>GAL4, UAS-GFP/+; UAS-Dl[IR]/+	6	>6	U
hsFLP/+; Act>y+>GAL4, UAS-GFP/+; UAS-Dl[IR]/+	7	>6	U
hsFLP/+; Act>y+>GAL4, UAS-GFP/+; UAS-Dl[IR]/+	8	>6	U
hsFLP/+; Act>y+>GAL4, UAS-GFP/+; UAS-Dl[IR]/+	9	>6	U
hsFLP/+; Act>y+>GAL4, UAS-GFP/+; UAS-Dl[IR]/+	10	>6	D
hsFLP/+; Act>y+>GAL4, UAS-GFP/+; UAS-Dl[IR]/+	11	>6	U
hsFLP/+; Act>y+>GAL4, UAS-GFP/+; UAS-Dl[IR]/+	12	>6	U
hsFLP/+; Act>y+>GAL4, UAS-GFP/+; UAS-Dl[IR]/+	13	>6	U
hsFLP/+; Act>y+>GAL4, UAS-GFP/+; UAS-Dl[IR]/+	14	>6	U
hsFLP/+; Act>y+>GAL4, UAS-GFP/+; UAS-Dl[IR]/+	15	>6	U
hsFLP/+; Act>y+>GAL4, UAS-GFP/+; UAS-Dl[IR]/+	16	>6	U
hsFLP/+; Act>y+>GAL4, UAS-GFP/+; UAS-Dl[IR]/+	17	>6	U
hsFLP/+; Act>y+>GAL4, UAS-GFP/+; UAS-Dl[IR]/+	18	>6	U
hsFLP/+; Act>y+>GAL4, UAS-GFP/+; UAS-Dl[IR]/+	19	>6	U
hsFLP/+; Act>y+>GAL4, UAS-GFP/+; UAS-Dl[IR]/+	20	>6	U
hsFLP/+; Act>y+>GAL4, UAS-GFP/+; UAS-Dl[IR]/+	21	>6	U
hsFLP/+; Act>y+>GAL4, UAS-GFP/+; UAS-Dl[IR]/+	22	>6	U
hsFLP/+; Act>y+>GAL4, UAS-GFP/+; UAS-Dl[IR]/+	23	>6	U
hsFLP/+; Act>y+>GAL4, UAS-GFP/+; UAS-Dl[IR]/+	24	>6	U
hsFLP/+; Act>y+>GAL4, UAS-GFP/+; UAS-Dl[IR]/+	25	>6	U
Wing Disc NRE-GFP clonal data
Genotype	Clone	Region	Area (In cell#)	NRE-GFP: None(N)/Border(B)/Whole(W)
Ubx-FLP/+; NRE-GFP/+; 82B, RFP/82B, Dl[revF10], Ser[rx82]	2	Hinge/Notum	13x32	W
Ubx-FLP/+; NRE-GFP/+; 82B, RFP/82B, Dl[revF10], Ser[rx82]	4.1	Hinge/Notum	18x24	N
Ubx-FLP/+; NRE-GFP/+; 82B, RFP/82B, Dl[revF10], Ser[rx82]	4.2	Hinge/Notum	15x20	B
Ubx-FLP/+; NRE-GFP/+; 82B, RFP/82B, Dl[revF10], Ser[rx82]	5.1	Hinge/Notum	36x12	W
Ubx-FLP/+; NRE-GFP/+; 82B, RFP/82B, Dl[revF10], Ser[rx82]	5.2	Hinge/Notum	12x8	W
Ubx-FLP/+; NRE-GFP/+; 82B, RFP/82B, Dl[revF10], Ser[rx82]	6.3	Hinge/Notum	15x12	W
Ubx-FLP/+; NRE-GFP/+; 82B, RFP/82B, Dl[revF10], Ser[rx82]	7.2	Hinge/Notum	30x15	B
Ubx-FLP/+; NRE-GFP/+; 82B, RFP/82B, Dl[revF10], Ser[rx82]	8.1	Hinge/Notum	18x18	W
Ubx-FLP/+; NRE-GFP/+; 82B, RFP/82B, Dl[revF10], Ser[rx82]	8.2	Hinge/Notum	10x22	W
Ubx-FLP/+; NRE-GFP/+; 82B, RFP/82B, Dl[revF10], Ser[rx82]	8.4	Hinge/Notum	10x15	N
Ubx-FLP/+; NRE-GFP/+; 82B, RFP/82B, Dl[revF10], Ser[rx82]	9.1	Hinge/Notum	14x8	W
Ubx-FLP/+; NRE-GFP/+; 82B, RFP/82B, Dl[revF10], Ser[rx82]	9.3	Hinge/Notum	12x18	B
Ubx-FLP/+; NRE-GFP/+; 82B, RFP/82B, Dl[revF10], Ser[rx82]	9.4	Hinge/Notum	12x6	N
Ubx-FLP/+; NRE-GFP/+; 82B, RFP/82B, Dl[revF10], Ser[rx82]	10.1	Hinge/Notum	11x11	W
Ubx-FLP/+; NRE-GFP/+; 82B, RFP/82B, Dl[revF10], Ser[rx82]	10.2	Hinge/Notum	24x15	B
Ubx-FLP/+; NRE-GFP/+; 82B, RFP/82B, Dl[revF10], Ser[rx82]	10.3	Hinge/Notum	30x30	W
Ubx-FLP/+; NRE-GFP/+; 82B, RFP/82B, Dl[revF10], Ser[rx82]	11.1	Hinge/Notum	20x20	B
Ubx-FLP/+; NRE-GFP/+; 82B, RFP/82B, Dl[revF10], Ser[rx82]	11.2	Hinge/Notum	40x12	W
Ubx-FLP/+; NRE-GFP/+; 82B, RFP/82B, Dl[revF10], Ser[rx82]	11.4	Hinge/Notum	12x12	W
Ubx-FLP/+; NRE-GFP/+; 82B, RFP/82B, Dl[revF10], Ser[rx82]	13.2	Hinge/Notum	14x20	W
Ubx-FLP/+; NRE-GFP/+; 82B, RFP/82B, Dl[revF10], Ser[rx82]	13.3	Hinge/Notum	12x15	B
Ubx-FLP/+; NRE-GFP/+; 82B, RFP/82B, Dl[revF10], Ser[rx82]	14.2	Hinge/Notum	20x15	W
Ubx-FLP/+; NRE-GFP/+; 82B, RFP/82B, Dl[revF10], Ser[rx82]	15.2	Hinge/Notum	12x12	W?
Ubx-FLP/+; NRE-GFP/+; 82B, RFP/82B, Dl[revF10], Ser[rx82]	16.1	Hinge/Notum	24x14	N
Ubx-FLP/+; NRE-GFP/+; 82B, RFP/82B, Dl[revF10], Ser[rx82]	18.1	Hinge/Notum	20x13	W
Ubx-FLP/+; NRE-GFP/+; 82B, RFP/82B, Dl[revF10], Ser[rx82]	20.1	Hinge/Notum	18x10	W
Ubx-FLP/+; NRE-GFP/+; 82B, RFP/82B, Dl[revF10], Ser[rx82]	21.1	Hinge/Notum	17x18	B
Ubx-FLP/+; NRE-GFP/+; 82B, RFP/82B, Dl[revF10], Ser[rx82]	21.2	Hinge/Notum	15x12	W
Ubx-FLP/+; NRE-GFP/+; 82B, RFP/82B, Dl[revF10], Ser[rx82]	22.1	Hinge/Notum	12x12	W
Ubx-FLP/+; NRE-GFP/+; 82B, RFP/82B, Dl[revF10], Ser[rx82]	22.2	Hinge/Notum	12x12	W
Ubx-FLP/+; NRE-GFP/+; 82B, RFP/82B, Dl[revF10], Ser[rx82]	22.3	Hinge/Notum	20x10	W
Ubx-FLP/+; NRE-GFP/+; 82B, RFP/82B, Dl[revF10], Ser[rx82]	23.2	Hinge/Notum	18x18	B
Ubx-FLP/+; NRE-GFP/+; 82B, RFP/82B, Dl[revF10], Ser[rx82]	24.1	Hinge/Notum	20x10	W
Ubx-FLP/+; NRE-GFP/+; 82B, RFP/82B, Dl[revF10], Ser[rx82]	24.2	Hinge/Notum	30x10	W
Ubx-FLP/+; NRE-GFP/+; 82B, RFP/82B, Dl[revF10], Ser[rx82]	26.1	Hinge/Notum	20x9	W
Ubx-FLP/+; NRE-GFP/+; 82B, RFP/82B, Dl[revF10], Ser[rx82]	26.2	Hinge/Notum	30x8	B
Ubx-FLP/+; NRE-GFP/+; 82B, RFP/82B, Dl[revF10], Ser[rx82]	26.3	Hinge/Notum	20x20	W
Ubx-FLP/+; NRE-GFP/+; 82B, RFP/82B, Dl[revF10], Ser[rx82]	26.4	Hinge/Notum	22x14	N
Ubx-FLP/+; NRE-GFP/+; 82B, RFP/82B, Dl[revF10], Ser[rx82]	27.1	Hinge/Notum	12x12	W
Ubx-FLP/+; NRE-GFP/+; 82B, RFP/82B, Dl[revF10], Ser[rx82]	27.2	Hinge/Notum	21x13	N
Ubx-FLP/+; NRE-GFP/+; 82B, RFP/82B, Dl[revF10], Ser[rx82]	8.3	Hinge/Notum	10x10	B
Ubx-FLP/+; NRE-GFP/+; 82B, RFP/82B, Dl[revF10], Ser[rx82]	16.2	Hinge/Notum	23x13	N
Ubx-FLP/+; NRE-GFP/+; 82B, RFP/82B, Dl[revF10], Ser[rx82]	18.2	Hinge/Notum	24x20	N
Ubx-FLP/+; NRE-GFP/+; 82B, RFP/82B, Dl[revF10], Ser[rx82]	3	Pouch-V	12x12	N
Ubx-FLP/+; NRE-GFP/+; 82B, RFP/82B, Dl[revF10], Ser[rx82]	5.3	Pouch-V	12x12	B
Ubx-FLP/+; NRE-GFP/+; 82B, RFP/82B, Dl[revF10], Ser[rx82]	5.5	Pouch-V	20x6	N
Ubx-FLP/+; NRE-GFP/+; 82B, RFP/82B, Dl[revF10], Ser[rx82]	11.3	Pouch-V	12x12	N
Ubx-FLP/+; NRE-GFP/+; 82B, RFP/82B, Dl[revF10], Ser[rx82]	12.4	Pouch-V	24x20 triangle	N
Ubx-FLP/+; NRE-GFP/+; 82B, RFP/82B, Dl[revF10], Ser[rx82]	18.4	Pouch-V	12x12	N
Ubx-FLP/+; NRE-GFP/+; 82B, RFP/82B, Dl[revF10], Ser[rx82]	19.1	Pouch-V	20x30 triangle	B
Ubx-FLP/+; NRE-GFP/+; 82B, RFP/82B, Dl[revF10], Ser[rx82]	21.4	Pouch-V	30x10	N
Ubx-FLP/+; NRE-GFP/+; 82B, RFP/82B, Dl[revF10], Ser[rx82]	22.4	Pouch-V	30x8	N
Ubx-FLP/+; NRE-GFP/+; 82B, RFP/82B, Dl[revF10], Ser[rx82]	24.4	Pouch-V	12x12	B
Ubx-FLP/+; NRE-GFP/+; 82B, RFP/82B, Dl[revF10], Ser[rx82]	26.5	Pouch-V	12x12	N
Ubx-FLP/+; NRE-GFP/+; 82B, RFP/82B, Dl[revF10], Ser[rx82]	27.3	Pouch-V	20x15	N
Ubx-FLP/+; NRE-GFP/+; 82B, RFP/82B, Dl[revF10], Ser[rx82]	1.1	Pouch-D	12x14 triangle	B
Ubx-FLP/+; NRE-GFP/+; 82B, RFP/82B, Dl[revF10], Ser[rx82]	1.2	Pouch-D	4x7	W
Ubx-FLP/+; NRE-GFP/+; 82B, RFP/82B, Dl[revF10], Ser[rx82]	5.4	Pouch-D	6x10	W
Ubx-FLP/+; NRE-GFP/+; 82B, RFP/82B, Dl[revF10], Ser[rx82]	6.1	Pouch-D	12x15	B
Ubx-FLP/+; NRE-GFP/+; 82B, RFP/82B, Dl[revF10], Ser[rx82]	6.2	Pouch-D	18x11	N
Ubx-FLP/+; NRE-GFP/+; 82B, RFP/82B, Dl[revF10], Ser[rx82]	7.1	Pouch-D	20x10	W
Ubx-FLP/+; NRE-GFP/+; 82B, RFP/82B, Dl[revF10], Ser[rx82]	8.5	Pouch-D	25x13	B
Ubx-FLP/+; NRE-GFP/+; 82B, RFP/82B, Dl[revF10], Ser[rx82]	8.6	Pouch-D	10x15	B
Ubx-FLP/+; NRE-GFP/+; 82B, RFP/82B, Dl[revF10], Ser[rx82]	9.2	Pouch-D	12x12	B
Ubx-FLP/+; NRE-GFP/+; 82B, RFP/82B, Dl[revF10], Ser[rx82]	12.1	Pouch-D	8x18	W
Ubx-FLP/+; NRE-GFP/+; 82B, RFP/82B, Dl[revF10], Ser[rx82]	12.2	Pouch-D	20x20	B
Ubx-FLP/+; NRE-GFP/+; 82B, RFP/82B, Dl[revF10], Ser[rx82]	12.3	Pouch-D	18x18	W
Ubx-FLP/+; NRE-GFP/+; 82B, RFP/82B, Dl[revF10], Ser[rx82]	13.1	Pouch-D	15x8	B
Ubx-FLP/+; NRE-GFP/+; 82B, RFP/82B, Dl[revF10], Ser[rx82]	14.1	Pouch-D	20x30	B
Ubx-FLP/+; NRE-GFP/+; 82B, RFP/82B, Dl[revF10], Ser[rx82]	15.1	Pouch-D	14x14	W
Ubx-FLP/+; NRE-GFP/+; 82B, RFP/82B, Dl[revF10], Ser[rx82]	17.1	Pouch-D	24x13 triangle	W
Ubx-FLP/+; NRE-GFP/+; 82B, RFP/82B, Dl[revF10], Ser[rx82]	18.3	Pouch-D	20x20	B
Ubx-FLP/+; NRE-GFP/+; 82B, RFP/82B, Dl[revF10], Ser[rx82]	19.2	Pouch-D	17x17	W
Ubx-FLP/+; NRE-GFP/+; 82B, RFP/82B, Dl[revF10], Ser[rx82]	19.3	Pouch-D	20x10	N
Ubx-FLP/+; NRE-GFP/+; 82B, RFP/82B, Dl[revF10], Ser[rx82]	20.2	Pouch-D	13x11	B
Ubx-FLP/+; NRE-GFP/+; 82B, RFP/82B, Dl[revF10], Ser[rx82]	21.3	Pouch-D	35x23	B
Ubx-FLP/+; NRE-GFP/+; 82B, RFP/82B, Dl[revF10], Ser[rx82]	23.1	Pouch-D	13x11	N
Ubx-FLP/+; NRE-GFP/+; 82B, RFP/82B, Dl[revF10], Ser[rx82]	24.3	Pouch-D	20x10	B
Ubx-FLP/+; NRE-GFP/+; 82B, RFP/82B, Dl[revF10], Ser[rx82]	25.1	Pouch-D	20x20	N
Ubx-FLP/+; NRE-GFP/+; 82B, RFP/82B, Dl[revF10], Ser[rx82]	26.6	Pouch-D	20x20	B
